# Supplementary figures and images for: Evaluation of the impact of enhanced virtual forms and gamification on intervention identification in a pharmacist-led ambulatory care clinic
Source: PubMed Central journal article supplement — Explor Res Clin Soc Pharm. 2021 Sep 4;4:100068. doi: 10.1016/j.rcsop.2021.100068 (PMC9030281; doi:10.1016/j.rcsop.2021.100068), 2021-09-04

Supplemental Figure 1. Patient flow diagram.

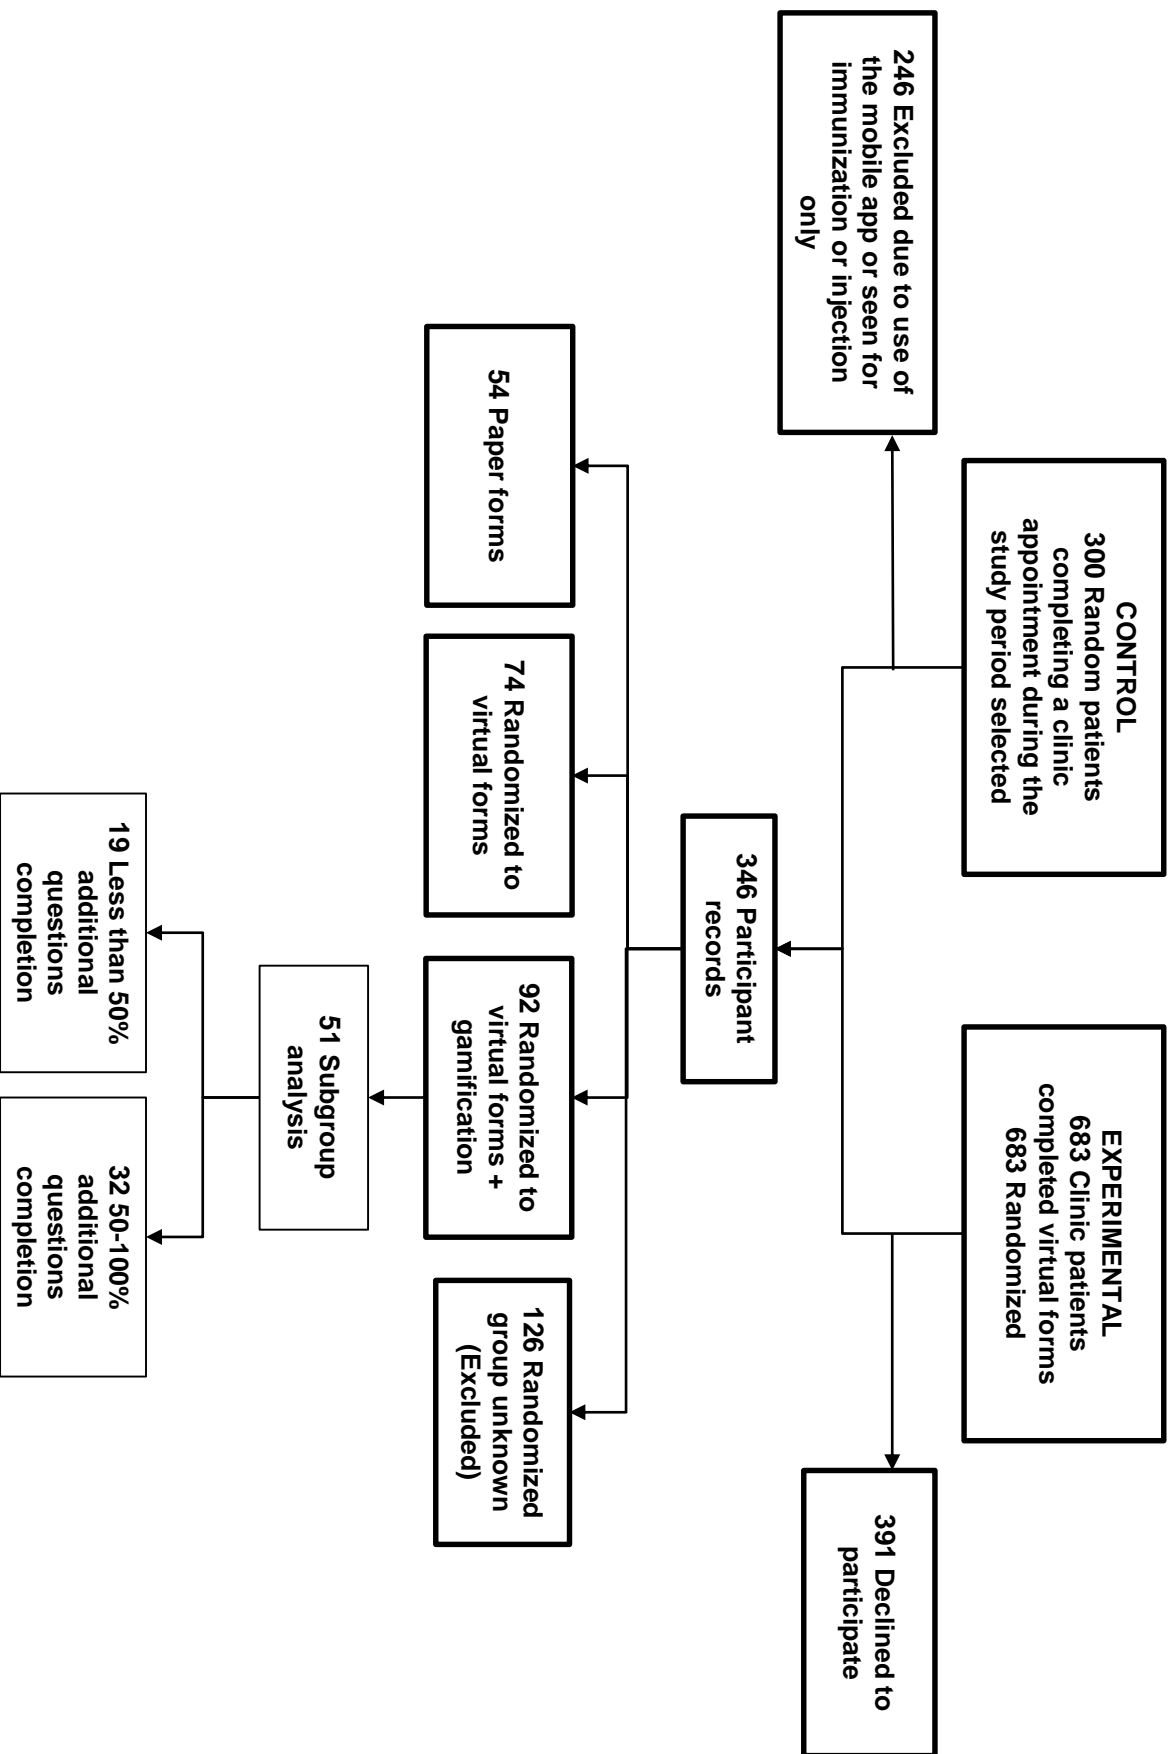

Supplement: mmc1.pdf [file mmc1.pdf]
